# Supplementary material for: The Combination of Scutellaria baicalensis Georgi and Sophora japonica L. ameliorate Renal Function by Regulating Gut Microbiota in Spontaneously Hypertensive Rats
Source: PubMed Central journal article supplement (PMC7907655; doi:10.3389/fphar.2020.575294), 2021-02-12

Supplement Figure 1. Mass spectra of the active ingredients in *Scutellaria baicalensis* Georgi and *Sophora japonica* L.

### 1.rutin

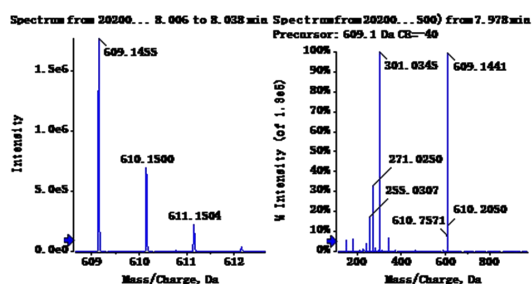

### 2.wogonoside

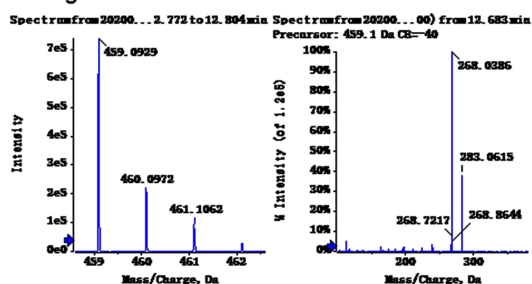

### 3.kaempferol-3-o-rutinoside

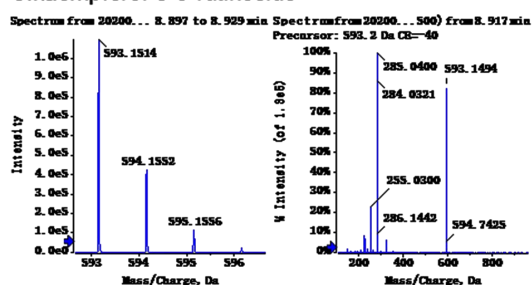

### 4.baicalin

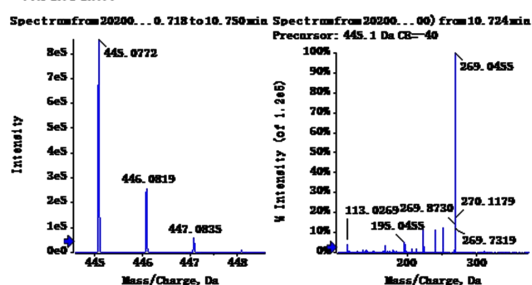

### 5.viscidulin

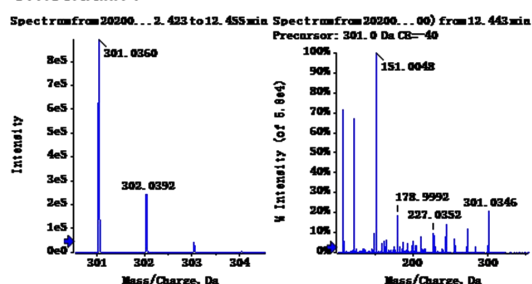

### 6.quercetin

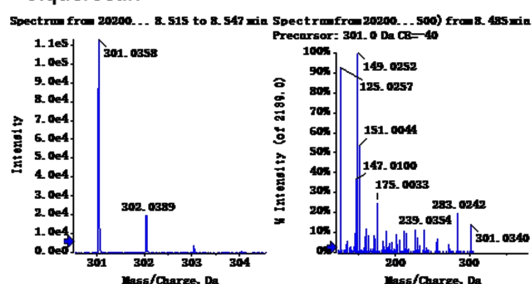

### 7.skullcapflavone II

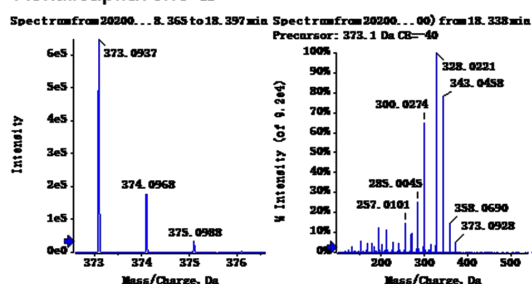

### 8.dihydrobaicalein

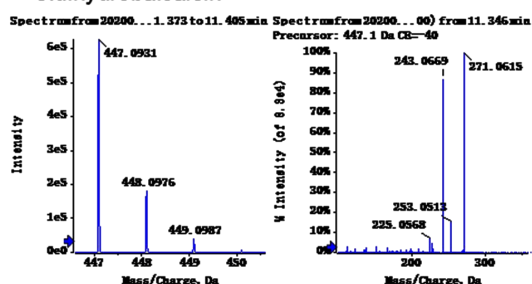

### 9. dihydrobaicalin

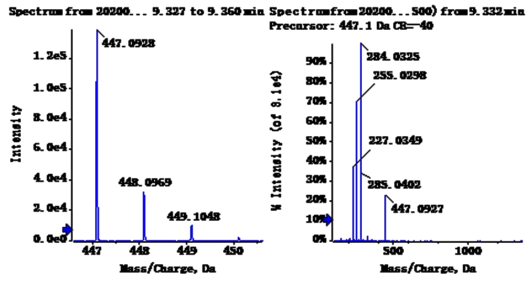

### 10. baicalein

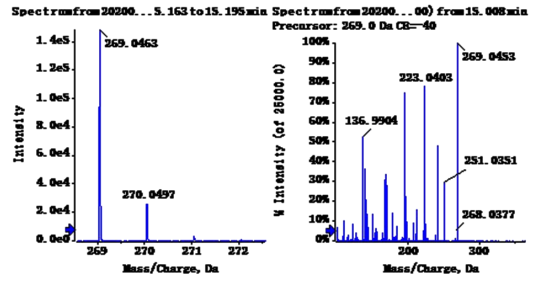

### 11. norwogonin

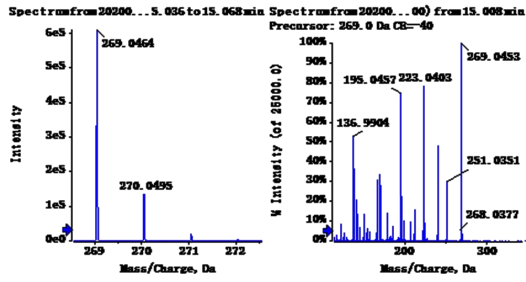

### 12. genistein

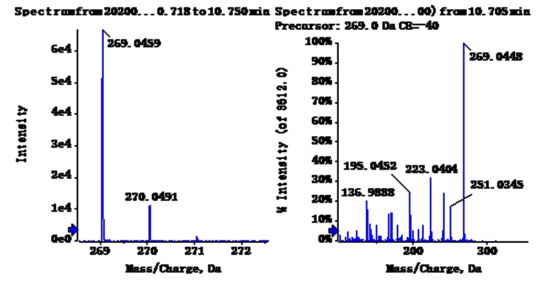

### 13. kaempferol

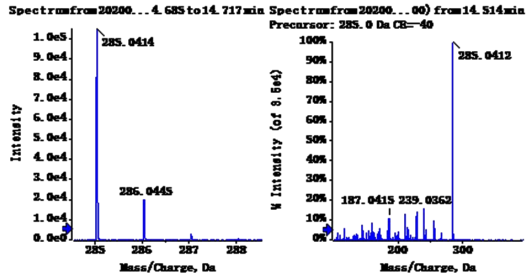

### 14. isorhamnetin

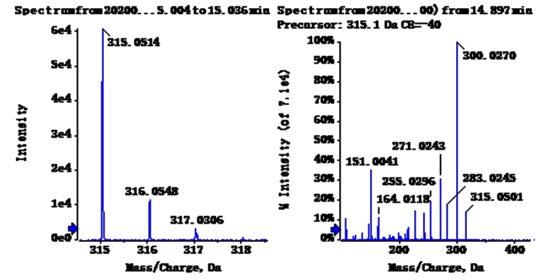

### 15. wogonin

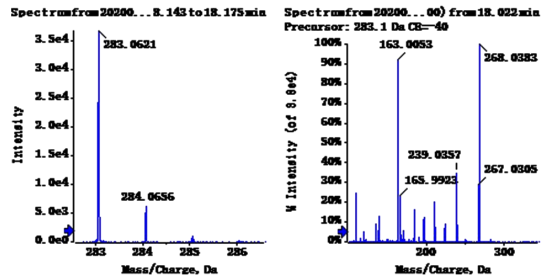

### 16. viscidulin III

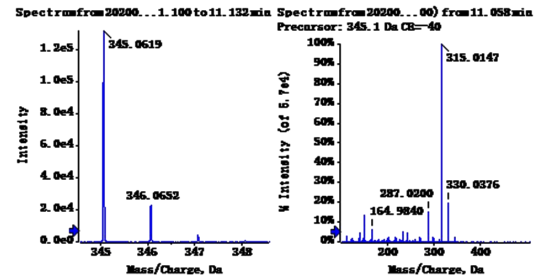

### 25.skullcapflavone I

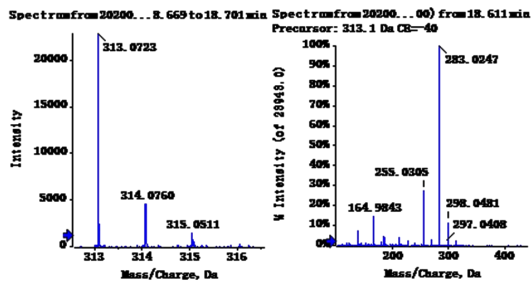

### 26.viscidulin II

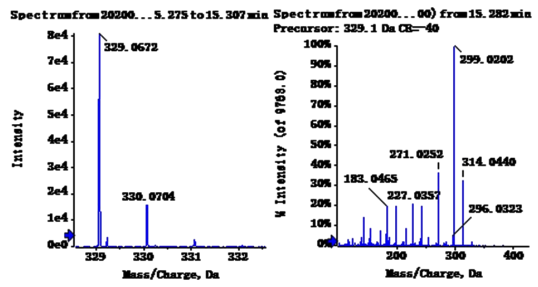

### 27.7,2'6'-trihydroxy-5-methoxydihydroflavone

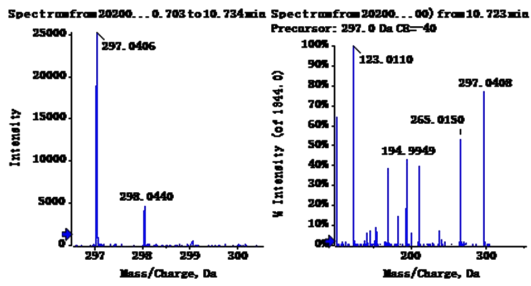

### 28.palmitic acid

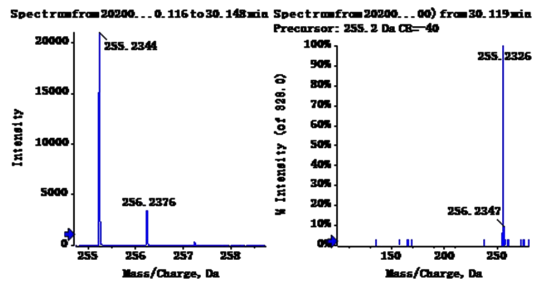

### 29.dihydrooroxilin A

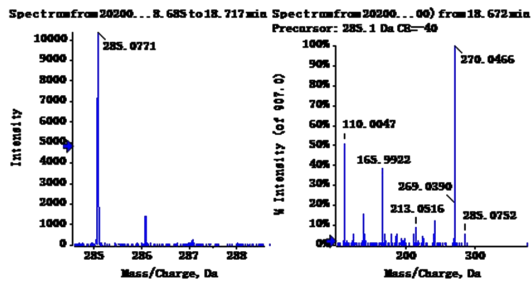

### 30.2',6',5,7-tetrahydroxyflavan-one

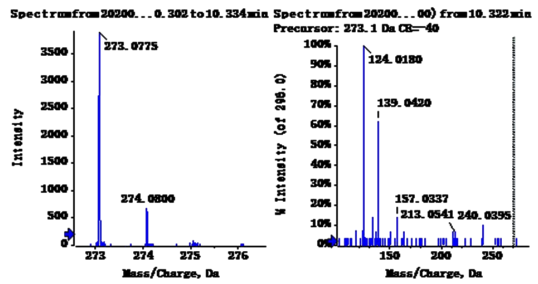

### 31.stearic acid

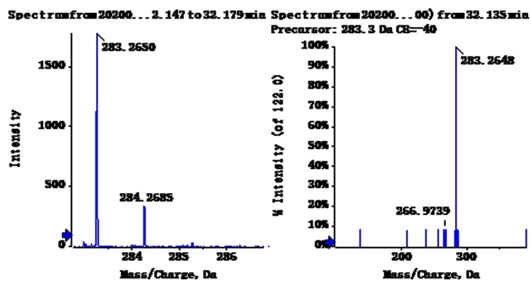

17.chrysin

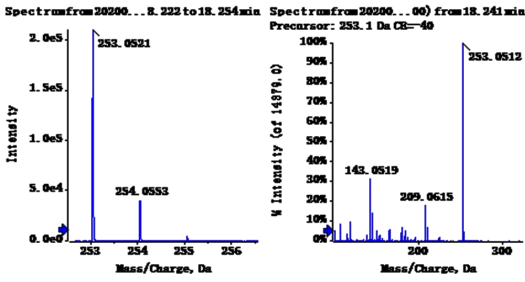

18.soyasaponin Bb

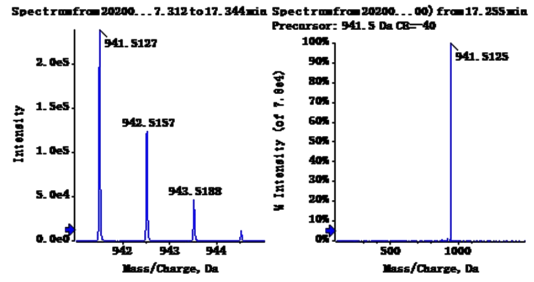

19.sophora saponin III

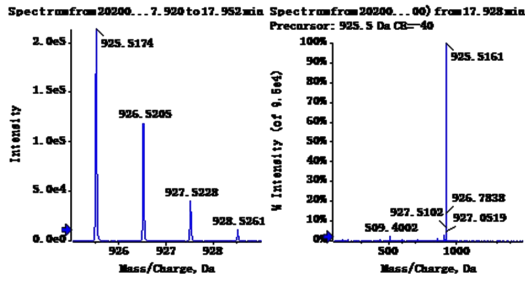

20.2',5,6',7-tetrahydroxyflavanonol

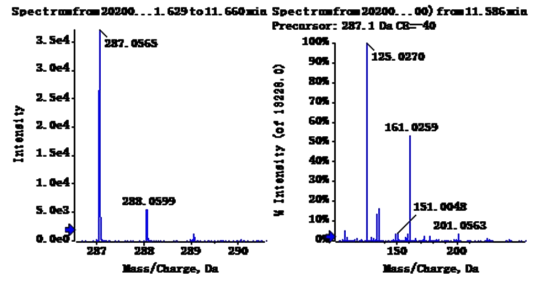

21.eriodyctol

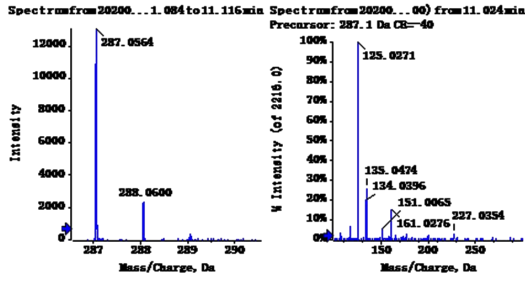

22.2,6,2',4'-tetrahydroxy-6'-methoxychalcone

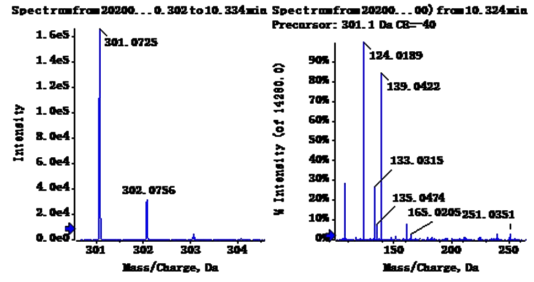

23.dianbaicalin

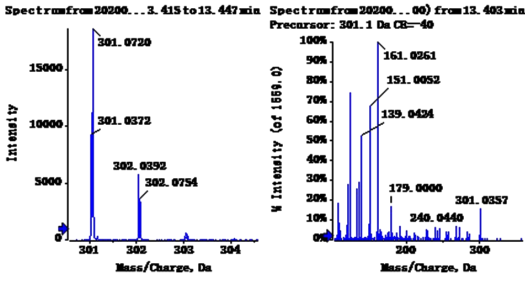

24.skullcapflavon

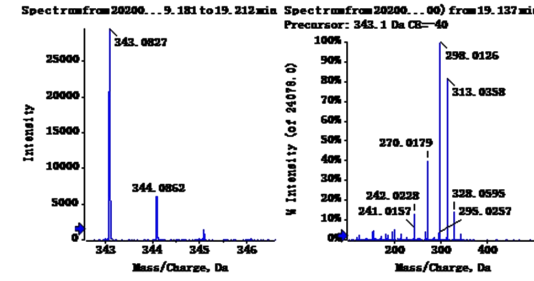

Supplement: image1.pdf [file image1.pdf]
